# Supplementary figures and images for: PubMed related articles: a probabilistic topic-based model for content similarity
Source: Springer Nature journal article supplement (doi:10.1186/1471-2105-8-423), 2007-10-30

Optimal  $\mu$  for each  $\lambda$  value in the *pmra* model

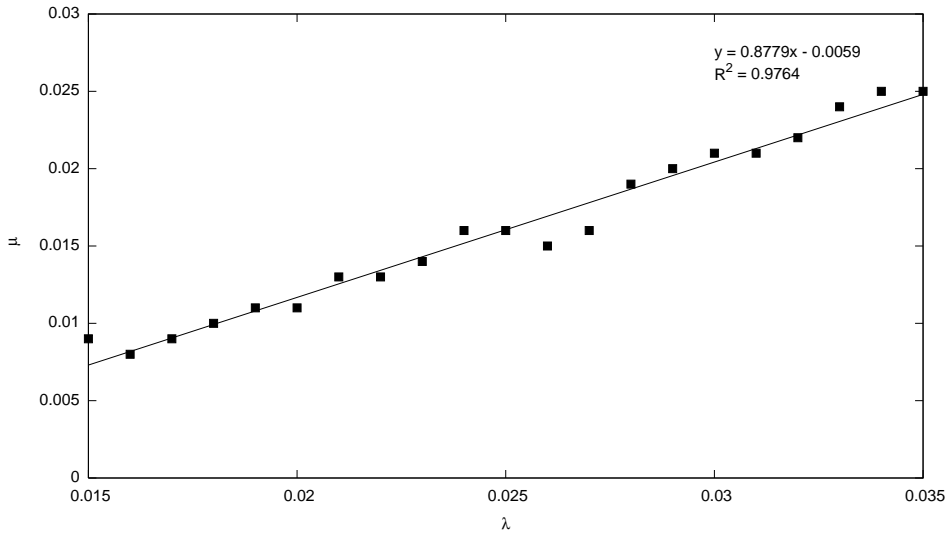

Supplement: 12859_2007_1795_MOESM4_ESM.pdf [file 12859_2007_1795_MOESM4_ESM.pdf]

P5 at optimal and interpolated values of  $\mu$  for each  $\lambda$  in the *pmra* model

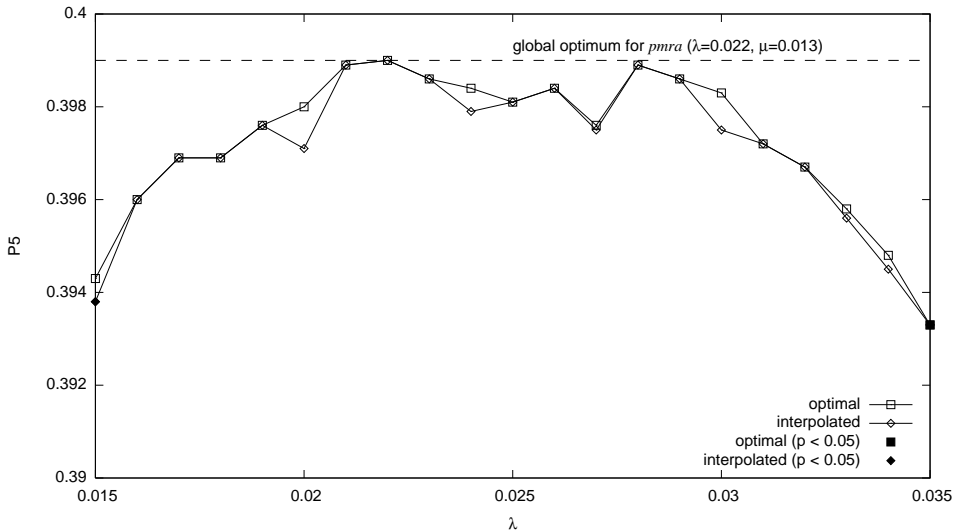

Supplement: 12859_2007_1795_MOESM5_ESM.pdf [file 12859_2007_1795_MOESM5_ESM.pdf]

Distribution of original ranks for reranked run: *pmra* ( $\lambda=0.022$ ,  $\mu=0.013$ )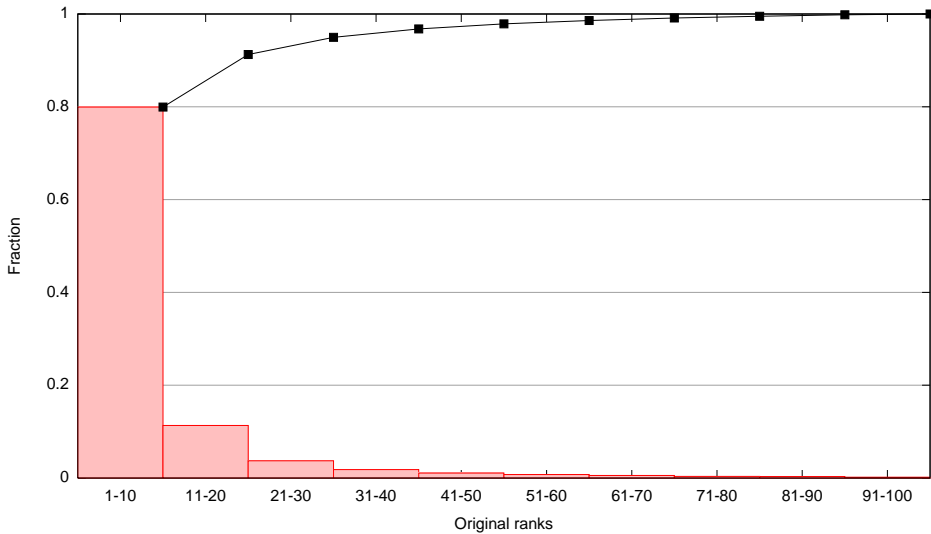

Supplement: 12859_2007_1795_MOESM6_ESM.pdf [file 12859_2007_1795_MOESM6_ESM.pdf]
